# Supplementary material
Source: PubMed Central journal article supplement (PMC3791762)
Supplement: 1313894110_pnas.201313894SI.pdf [file 1313894110_pnas.201313894SI.pdf]

# Supporting Information

Che et al. 10.1073/pnas.1313894110

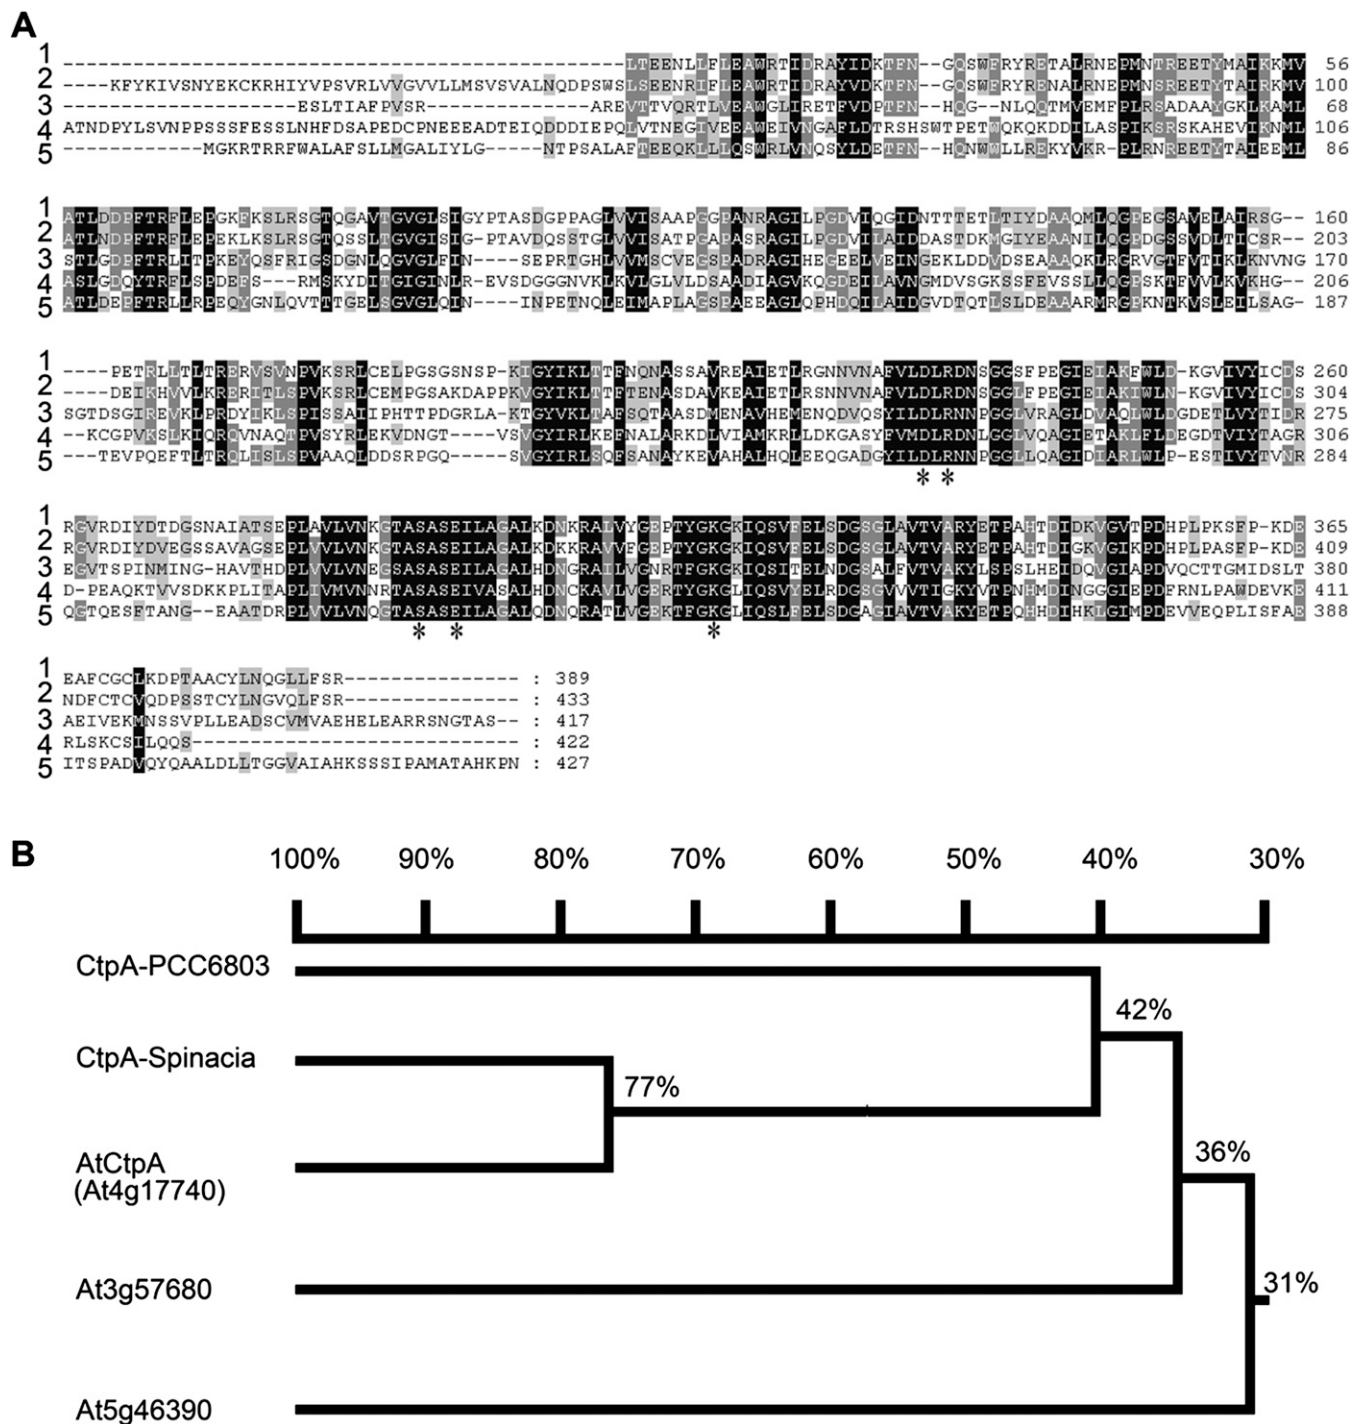

**Fig. S1.** Sequence analysis of carboxyl-terminal peptidase A (AtCtpA) and related protein sequences. (A) Comparison of amino acid sequences of mature proteins: (1) *Arabidopsis* carboxyl-terminal peptidase (CtpA; At4g17740); (2) *Spinacia* CtpA; (3) *Arabidopsis* At3g57680; (4) *Arabidopsis* At5g46390; and (5) *Synechocystis* PCC 6803 CtpA. \*Conserved residues essential for catalytic activity of CtpA. Identical and similar amino acids are highlighted by black and gray shading, respectively. Alignment of protein sequences was performed with ClustalX program ([www.ch.embnet.org/software/ClustalW.html](http://www.ch.embnet.org/software/ClustalW.html)). (B) Phylogeny of mature protein sequences from *Arabidopsis* CtpA, *Spinacia* CtpA, *Arabidopsis* At3g57680, *Arabidopsis* At5g46390, and *Synechocystis* PCC 6803 CtpA. The percentage indicates the similarity among different amino acid sequences. DNAMAN program was used in this analysis.

### C-terminal sequence in wild type

1451 CAAAGTCGTT TCCGAAAGAT GAAGAGGCGT TCTGTGGATG CCTTAAGGAT  
1501 CCTACAGCTG CTTGTTATCT CAATCAAGGC CTACTTTTTT CTAGATGA

451 LSDGSGGLAVT VARYETPAHT DIDKVGVTPD HPLPKSFPKD EEAFCGCLKD  
501 PTAACYLNQG LLFSR

### C-terminal sequence in *atctp-2*

1451 CAAAGTCGTT TCCGAAAGAT GAAGAGGCGT TCTGTGGATG CTAGACAAC  
1501 TTAATAACAC ATTGCGGACG TTTTTAA

451 LSDGSGGLAVT VARYETPAHT DIDKVGVTPD HPLPKSFPKD EEAFCGCLDN  
501 LI THCGRF

**Fig. S2.** Flanking sequences of transfer DNA (T-DNA) insertion in the *atctp-2* mutant compared with *AtCtpA* sequence in WT. The T-DNA insertion sequence and corresponding amino acid sequence are underlined. The mutated version of *AtCtpA* in the *atctp-2* mutant contains 497 aa of *AtCtpA* plus 11 aa from the T-DNA sequence.

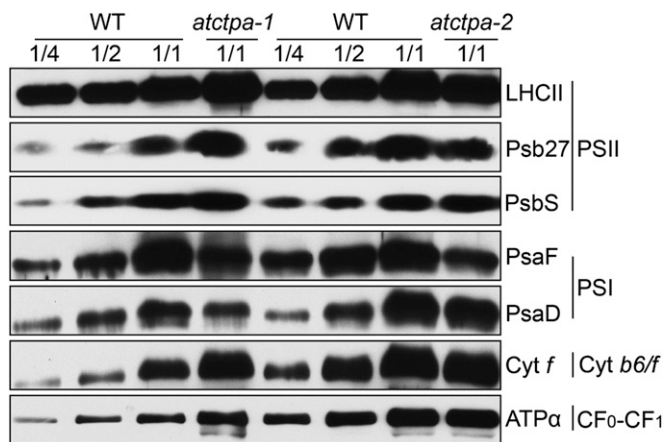

**Fig. S3.** Immunoblot analysis of representative subunits of photosynthetic complexes from wild-type (WT), *atctp-1*, and *atctp-2* plants. Chloroplast thylakoid protein samples equivalent to 2  $\mu$ g chlorophyll were resolved by 10% SDS/PAGE containing 8M urea; blots were probed with the indicated antibodies. The sample preparation and plant growth conditions were the same as that in Fig. 3.

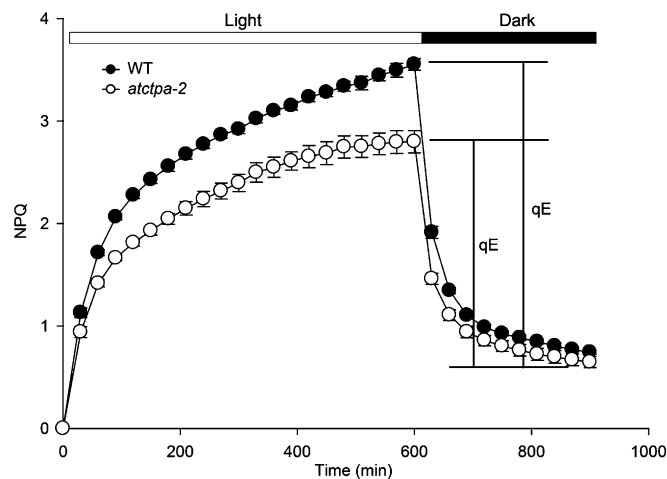

**Fig. S4.** Nonphotochemical quenching (NPQ) analyses. NPQ kinetics after rapid induction and dark relaxation were measured using intact leaves from 4-wk-old WT and *atctp-2* plants grown in soil (350  $\mu$ E) under long-day condition. Actinic light intensity, 1,800  $\mu$ E. Data are presented as means  $\pm$  SD ( $n = 4$ ). WT and *atctp-2* data are significantly different except for the last three time points ( $P < 0.05$ ).

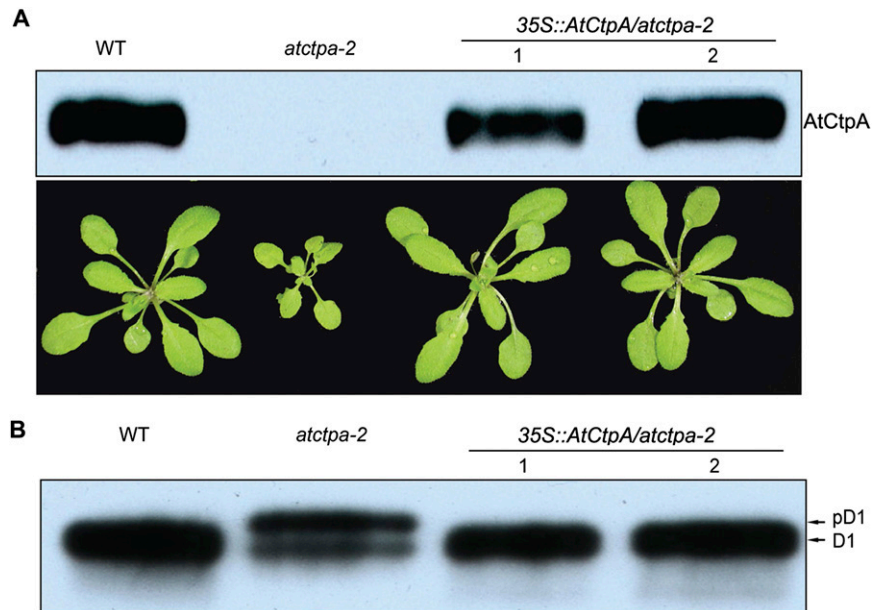

**Fig. S5.** Complementation of *atctpa-2* mutant. (A, Upper) Immunoblot analysis of AtCtpA in WT, *atctpa-2*, and two independent lines of *atctpa-2* mutant plants complemented with *35S::AtCtpA* construct. (A, Lower) Photographs of corresponding plants of WT, *atctpa-2*, and complemented lines. Plants were grown under 350  $\mu$ E for 4 wk in soil with long-day cycle. (B) D1 status in WT, *atctpa-2*, and *35S::AtCtpA/atctpa-2* plants after 2 h high light treatment (1,800  $\mu$ E). Immunoblot analysis was carried out as that in Fig. 3.

**Table S1. Primers used in this study**

| Primer name                 | Primer sequence                       |
|-----------------------------|---------------------------------------|
| <i>atctpa-1</i> left board  | GCCTCGAGGAAGAGAAGATTC                 |
| <i>atctpa-1</i> right board | TTCCTTGATGGTGGTTCAGTC                 |
| <i>atctpa-2</i> left board  | GTGGAGGTTCTTCCAGAAAG                  |
| <i>atctpa-2</i> right board | GCTTGCTCTGGTGATTTTGG                  |
| LBb1.3                      | ATTTTGCCGATTCGGAAC                    |
| P1 F                        | AGAGTTGGAATTTCCGGGGAA                 |
| P1 R                        | GAAATTTCTGGTTTCGATTAGCTAAAGCTAT       |
| P2 F                        | ATGGAGGTCCTTGGAGCTTTCAT               |
| P2 R                        | GCATCCACAGAACGCCTCTT                  |
| AtCtpA CDS F                | ATGGAGGTCCTTGGAGCTTTCAT               |
| AtCtpA CDS R                | TCATCTAGAAAAAGTAGGCCTTGATTGAGATAACAAG |
| Actin2 F                    | GGAAGGATCTGTACGGTAAC                  |
| Actin2 R                    | TGTGAACGATTCTGGACCT                   |
